# Supplementary material
Source: Royal Society of Chemistry journal article supplement (doi:10.1039/d6em00024j)
Supplement: d6em00024j1.pdf [file d6em00024j1.pdf]

1 **Title:** Effects of fluorinated ski wax bans on per- and polyfluoroalkyl substances (PFAS)  
2 concentrations in indoor dust from ski waxing workspaces

3

4 **Authors:** Kathryn A. Crawford,<sup>1\*</sup> Nicola Hartmann,<sup>2,3</sup> Emilia Andersen,<sup>2,3</sup> Celeste Alden,<sup>4</sup>  
5 Divya Gudur<sup>1</sup>, Bharat Chandramouli<sup>5</sup>

6

7 **Author Affiliations:**

8 <sup>1</sup> Environmental Studies Program, Middlebury College, Middlebury, VT, USA

9 <sup>2</sup> Program in Molecular Biology & Biochemistry, Middlebury College, Middlebury, VT, USA

10 <sup>3</sup> Global Health Program, Middlebury College, Middlebury, VT, USA

11 <sup>4</sup> Department of Earth and Climate Science, Middlebury College, Middlebury, VT, USA

12 <sup>5</sup> SGS AXYS Analytical Services, Ltd. Sidney, British Columbia, Canada

13

14

15

16 **Table S1.** Quality control specification for PFAS analyzed via US EPA Method 1633, SGS AXYS Method MLA-110, in dust wipe  
17 samples collected from wax bench workstations before (2020) and after (2023) fluorinated wax bans were implemented. Method  
18 LODs represent those established for biosolid samples. SDL ranges reported for all samples in each sampling year. Matrix spike and  
19 allowable recovery ranges reported for all procedural blanks analyzed in each sampling year. Abbreviations: CAS = Chemical  
20 Abstract Service; LOD = limit of detection; ng/g dw = nanograms per gram wet dry weight; SDL = sample detection limit; ww = wet  
21 weight; N/A = not measured. Bolded values reflect those above or below the acceptable recovery range.

| PFAS Compound                                    | Abbreviation | CAS Registry # | Method LOD (ng/g dw) | Allowable Recovery (%) | 2020          |                           | 2023          |                           |
|--------------------------------------------------|--------------|----------------|----------------------|------------------------|---------------|---------------------------|---------------|---------------------------|
|                                                  |              |                |                      |                        | SDL (ng/g ww) | Matrix Spike Recovery (%) | SDL (ng/g ww) | Matrix Spike Recovery (%) |
| Perfluorobutanoic acid                           | PFBA         | 375-22-4       | 6.4                  | 70-140                 | 0.228 - 8.83  | 104 - 107                 | 0.316 - 2.89  | 94.9 - 144                |
| Perfluoropentanoic acid                          | PFPeA        | 2706-90-3      | 3.2                  | 60-150                 | 0.114 - 4.42  | 97.4 - 110                | 0.158 - 1.44  | 93.0 - 140                |
| Perfluorohexanoic acid                           | PFHxA        | 307-24-4       | 1.6                  | 65-140                 | 0.057 - 2.21  | 75.9 - 104                | 0.079 - 0.721 | 92.8 - 106                |
| Perfluoroheptanoic acid                          | PFHpA        | 375-85-9       | 1.6                  | 65-145                 | 0.057 - 2.21  | 102 - 107                 | 0.079 - 0.721 | 102 - 115                 |
| Perfluorooctanoic acid                           | PFOA         | 335-67-1       | 1.6                  | 70-150                 | 0.057 - 2.21  | 94.0 - 105                | 0.087 - 0.721 | 94.3 - 108                |
| Perfluorononanoic acid                           | PFNA         | 375-95-1       | 1.6                  | 70-155                 | 0.084 - 2.21  | 97.8 - 107                | 0.079 - 0.721 | 97.3 - 108                |
| Perfluorodecanoic acid                           | PFDA         | 335-76-2       | 1.6                  | 70-155                 | 0.057 - 2.21  | 103 - 111                 | 0.079 - 0.721 | 85.2 - 105                |
| Perfluoroundecanoic acid                         | PFUNA        | 2058-94-8      | 1.6                  | 70-155                 | 0.057 - 2.21  | 94.6 - 99.4               | 0.079 - 0.721 | 92.2 - 109                |
| Perfluorododecanoic acid                         | PFDoA        | 307-55-1       | 1.6                  | 70-150                 | 0.057 - 2.21  | 104 - 112                 | 0.063 - 0.577 | 98.0 - 111                |
| Perfluorotridecanoic acid                        | PFTTrDA      | 72629-94-8     | 1.6                  | 65-150                 | 0.057 - 9.00  | 104 - 123                 | 0.079 - 0.721 | 99.7 - 109                |
| Perfluorotetradecanoic acid                      | PFTTeDA      | 376-06-7       | 1.6                  | 65-150                 | 0.169 - 5.83  | 104 - 110                 | 0.079 - 0.721 | 95.1 - 108                |
| Perfluorobutanesulfonic acid                     | PFBS         | 375-73-5       | 1.6                  | 65-145                 | 0.057 - 2.21  | 93.3 - 122                | 0.079 - 0.721 | 91.3 - 110                |
| Perfluoropentanesulfonic acid                    | PFPeS        | 2706-91-4      | 1.6                  | 55-160                 | 0.057 - 2.22  | 96.0 - 105                | 0.080 - 0.725 | 95.6 - 109                |
| Perfluorohexanesulfonic acid                     | PFHxS        | 355-46-4       | 2.4                  | 60-150                 | 0.057 - 2.21  | 93.1 - 101                | 0.079 - 0.721 | 87.1 - 100                |
| Perfluoroheptanesulfonic acid                    | PFHpS        | 375-92-8       | 1.6                  | 65-155                 | 0.057 - 2.21  | 96.7 - 108                | 0.079 - 0.721 | 93.8 - 109                |
| Perfluorooctanesulfonic acid                     | PFOS         | 1763-23-1      | 1.6                  | 65-160                 | 0.057 - 2.21  | 97.2 - 97.9               | 0.079 - 0.721 | 87.5 - 106                |
| Perfluorononanesulfonic acid                     | PFNS         | 68259-12-1     | 1.6                  | 55-140                 | 0.057 - 2.21  | 90.1 - 119                | 0.079 - 0.721 | 81.6 - 95.1               |
| Perfluorodecanesulfonic acid                     | PFDS         | 335-77-3       | 1.6                  | 40-155                 | 0.057 - 2.21  | 95.6 - 115                | 0.079 - 0.722 | 87.5 - 113                |
| Perfluorododecanesulfonic acid                   | PFDoS        | 79780-39-5     | 1.6                  | 25-160                 | 0.057 - 2.21  | 89.2 - 118                | 0.079 - 0.721 | 86.5 - 97.1               |
| 3:3 Fluorotelomer carboxylic acid                | 3:3 FTCA     | 356-02-5       | 6.4                  | 45-130                 | 0.228 - 8.83  | 102 - 112                 | 0.316 - 2.89  | 88.9 - 106                |
| 5:3 Fluorotelomer carboxylic acid                | 5:3 FTCA     | 914637-49-3    | 40                   | 60-130                 | 1.42 - 55.2   | 97.0 - 106                | 1.98 - 18.0   | 86.2 - 108                |
| 7:3 Fluorotelomer carboxylic acid                | 7:3 FTCA     | 812-70-4       | 40                   | 60-150                 | 1.42 - 55.2   | 104 - 112                 | 1.98 - 18.0   | 90.1 - 101                |
| 4:2 Fluorotelomer sulfonic acid                  | 4:2 FTS      | 757124-72-4    | 6.4                  | 60-150                 | 0.228 - 8.83  | 105 - 106                 | 0.316 - 2.89  | 92.5 - 106                |
| 6:2 Fluorotelomer sulfonic acid                  | 6:2 FTS      | 27619-97-2     | 22.1                 | 55-200                 | 0.205 - 7.96  | 102 - 104                 | 0.285 - 2.60  | 99.4 - 116                |
| 8:2 Fluorotelomer sulfonic acid                  | 8:2 FTS      | 39108-34-4     | 6.4                  | 70-150                 | 0.228 - 8.83  | 103 - 118                 | 0.269 - 2.45  | 83.3 - 111                |
| Perfluorooctanesulfonamide                       | PFOSA        | 754-91-6       | 1.6                  | 70-140                 | 0.057 - 2.21  | 84.1 - 102                | 0.079 - 0.721 | 76.4 - 104                |
| N-Methylperfluorooctanesulfonamide               | N-MeFOSA     | 31506-32-8     | 1.6                  | 70-155                 | 0.066 - 2.54  | 94.8 - 99.8               | N/A           | 82.5 - 105                |
| N-Ethylperfluorooctanesulfonamide                | N-EtFOSA     | 4151-50-2      | 1.6                  | 70-140                 | 0.142 - 5.52  | 102 - 108                 | N/A           | 95.9 - 107                |
| N-Methylperfluoro-1-octanesulfonamidoacetic acid | N-MeFOSAA    | 2355-31-9      | 1.6                  | 65-155                 | 0.057 - 2.21  | 111 - 119                 | 0.079 - 0.721 | 80.1 - 107                |
| N-Ethylperfluoro-1-octanesulfonamidoacetic acid  | N-EtFOSAA    | 2991-50-6      | 1.6                  | 65-165                 | 0.057 - 2.21  | 93.3 - 116                | 0.079 - 0.721 | 90.8 - 108                |
| N-Methylperfluoro-1-octanesulfonamidoethanol     | N-MeFOSE     | 24448-09-7     | 16                   | 70-140                 | 0.570 - 22.1  | 102 - 105                 | 0.791 - 7.21  | 82.6 - 133                |
| N-Ethylperfluoro-1-octanesulfonamidoethanol      | N-EtFOSE     | 1691-99-2      | 16                   | 70-135                 | 0.426 - 16.5  | 102 - 114                 | 0.791 - 7.21  | 84.8 - 108                |
| Hexafluoropropylene oxide dimer acid             | HFPO-DA      | 13252-13-6     | 6.4                  | 70-145                 | 0.319 - 8.39  | 94.9 - 97.9               | 0.316 - 2.89  | 74.7 - 106                |
| 4,8-Dioxa-3H-perfluorononanoic acid              | ADONA        | 919005-14-4    | 6.4                  | 70-160                 | 0.228 - 8.83  | 84.5 - 100                | 0.316 - 2.89  | 79.7 - 110                |
| Nonafluoro-3,6-dioxahexanoic acid                | NFDHA        | 151772-58-6    | 3.2                  | 60-155                 | 0.114 - 4.42  | 85.3 - 106                | 0.158 - 1.44  | 96.3 - 103                |
| Perfluoro-4-methoxybutanoic acid                 | PFMBA        | 863090-89-5    | 1.6                  | 30-140                 | 0.057 - 2.21  | 73.1 - 100                | 0.079 - 0.721 | 67.7 - 90.5               |
| Perfluoro-3-methoxypropanoic acid                | PFMPA        | 377-73-1       | 3.2                  | 70-130                 | 0.114 - 4.42  | 108 - 112                 | 0.158 - 1.44  | 88.5 - 114                |
| 9-chlorohexadecafluoro-3-oxanone-1-sulfonate     | 9Cl-PF3ONS   | 756426-58-1    | 6.4                  | 70-150                 | 0.228 - 8.86  | 92.2 - 107                | 0.317 - 2.89  | 86.8 - 103                |
| 11-chloroeicosafluoro-3-oxaundecane-1-sulfonate  | 11Cl-PF3OUdS | 763051-92-9    | 6.4                  | 45-160                 | 0.228 - 8.85  | 98.3 - 106                | 0.317 - 2.89  | 85.8 - 107                |
| Perfluoro(2-ethoxyethane) sulfonic acid          | PFEESA       | 113507-82-7    | 1.6                  | 70-140                 | 0.057 - 2.21  | 104 - 109                 | 0.079 - 0.723 | 78.5 - 110                |

23 **Table S2.** Range of allowed (biosoloids) and measured surrogate standard recoveries in samples  
 24 and process blanks for PFAS analyzed via US EPA Method 1633, SGS AXYS Method MLA-  
 25 110, in dust wipe samples collected from wax bench workstations before (2020) and after (2023)  
 26 fluorinated wax bans were implemented. Bolded values reflect those above or below the  
 27 acceptable recovery range.  
 28

| PFAS Compound | Allowable Recovery (%) | Sample Surrogate Recovery (%) |                    | Blank Surrogate Recovery (%) |                    |
|---------------|------------------------|-------------------------------|--------------------|------------------------------|--------------------|
|               |                        | 2020                          | 2023               | 2020                         | 2023               |
| 13C4-PFBA     | 5-130                  | 52.6 - 91.8                   | 46.4 - 96.1        | 91.5 - 98.3                  | 82.2 - 99.7        |
| 13C5-PFPeA    | 35-130                 | 47.8 - 117                    | 49.8 - 108         | 84.4 - 86.6                  | 92.4 - 109         |
| 13C5-PFHxA    | 40-130                 | 46.6 - 122                    | 48.1 - 95.8        | 77.6 - 88.4                  | 87.9 - 100         |
| 13C4-PFHpA    | 40-130                 | 51.1 - 100                    | 44.5 - 90.9        | 84.3 - 97.2                  | 78.5 - 96.6        |
| 13C8-PFOA     | 40-130                 | 52.2 - 85.6                   | 45.2 - 92.6        | 87.2 - 96.2                  | 83.3 - 95.0        |
| 13C9-PFNA     | 40-145                 | 49.2 - 99.9                   | 50.3 - 102         | 87.9 - 98.0                  | 94.6 - 101         |
| 13C6-PFDA     | 40-130                 | 45.0 - 95.8                   | 48.0 - 95.2        | 94.9 - 96.4                  | 80.9 - 96.0        |
| 13C7-PFUnA    | 40-130                 | 56.3 - 105                    | 50.9 - 106         | 98.0 - 131                   | 90.2 - 101         |
| 13C2-PFDoA    | 40-130                 | 55.1 - 97.4                   | 47.4 - 113         | 93.0 - 118                   | 80.4 - 94.8        |
| 13C2-PFTeDA   | 10-160                 | 77.9 - 154                    | 32.4 - 97.1        | 82.7 - 126                   | 73.5 - 80.3        |
| 13C3-PFBS     | 40-150                 | 46.4 - 97.0                   | 40.9 - 94.8        | 85.0 - 98.4                  | 79.7 - 96.3        |
| 13C3-PFHxS    | 40-140                 | 48.9 - 93.7                   | 44.8 - 103         | 90.5 - 103                   | 89.8 - 100         |
| 13C8-PFOA     | 40-130                 | 48.0 - 99.7                   | 51.7 - 105         | 86.1 - 95.7                  | 96.7 - 105         |
| 13C2-4:2 FTS  | 40-300                 | 55.1 - 106                    | 51.8 - 115         | 95.6 - 96.7                  | 91.3 - 131         |
| 13C2-6:2 FTS  | 40-300                 | <b>39.0</b> - 104             | 42.8 - 94.4        | 73.2 - 91.0                  | 82.3 - 95.4        |
| 13C2-8:2 FTS  | 40-300                 | <b>38.3</b> - 105             | 40.1 - 80.1        | 80.6 - 97.4                  | 75.0 - 88.8        |
| 13C8-PFOA     | 20-140                 | 62.4 - 107                    | 64.2 - 157         | 74.4 - 87.4                  | 87.4 - 115         |
| D3-N-MeFOSA   | 20-130                 | 53.0 - 86.6                   | <b>1.07</b> - 90.4 | 61.2 - 61.9                  | 30.7 - 83.1        |
| D5-N-EtFOSA   | 20-130                 | 49.3 - 72.6                   | <b>1.27</b> - 87.9 | 49.0 - 53.8                  | <b>18.6</b> - 80.1 |
| D3-MeFOSAA    | 30-150                 | 51.3 - 101                    | 44.2 - 98.1        | 63.8 - 104                   | 74.2 - 109         |
| D5-EtFOSAA    | 20-140                 | 58.8 - 103                    | 48.2 - 106         | 71.3 - 105                   | 73.7 - 118         |
| d7-NMe-FOSE   | 25-130                 | 57.1 - 100                    | <b>5.88 - 134</b>  | 64.5 - 87.0                  | 49.8 - 108         |
| d9-NEt-FOSE   | 20-130                 | 56.4 - 112                    | <b>6.11 - 157</b>  | 57.2 - 100                   | 56.0 - 121         |
| 13C3-HFPO-DA  | 40-130                 | <b>33.0</b> - 117             | <b>39.8</b> - 87.4 | 83.1 - 88.6                  | 73.9 - 109         |

29

30 **Table S3.** Concentrations of individual PFAS compounds (ng/cm<sup>2</sup>) detected in each dust wipe sample in 2020 and 2023. The  $\Sigma$ PFAS  
 31 concentration for each sample was calculated as the sum of individual PFAS compounds accumulated during the course of a workday.  
 32 PFBA, PFPeA, and 6:2 FTS were removed from 2023 analyses for QA/QC purposes. PFAS compounds analyzed, but not detected in  
 33 any dust wipe sample from either year include: PFPeS, PFHpS, PFNS, PFDS, PFDoS, 3:3 FTCA, 5:3 FTCA, 7:3 FTCA, 4:2 FTS,  
 34 PFOSA, N-EtFOSEA, MeFOSAA, EtFOSAA, N-MeFOSE, ADONA, NFDHA, PFMBA, 9Cl-PF3ONS, 11Cl-PF3OUdS, PFEESA.  
 35

| PFAS Analyte    | 2020        |             |             |             |             |            | 2023         |              |              |              |              |              |              |              |              |              |              |              |              |              |       |
|-----------------|-------------|-------------|-------------|-------------|-------------|------------|--------------|--------------|--------------|--------------|--------------|--------------|--------------|--------------|--------------|--------------|--------------|--------------|--------------|--------------|-------|
|                 | A1          | A2          | B1          | B2          | C1          | C2         | D1           | D2           | D3           | D4           | E1           | E2           | F1           | F2           | F3           | F4           | G1           | G2           | G3           | G4           |       |
| PFBA            | 0.119       | 0.034       | 0.016       | 0.009       | 0.070       | 0.558      | --           | --           | --           | --           | --           | --           | --           | --           | --           | --           | --           | --           | --           | --           | --    |
| PFPeA           | 0.130       | 0.031       | 0.005       | 0.012       | 0.092       | 0.540      | --           | --           | --           | --           | --           | --           | --           | --           | --           | --           | --           | --           | --           | --           | --    |
| PFHxA           | 0.331       | 0.164       | 0.103       | 0.060       | 0.646       | 2.77       | 0.020        | 0.007        | 0.007        | 0.001        | 0.016        | 0.003        | 0.039        | 0.007        | 0.007        | 0.009        | 0.011        | 0.011        | 0.007        | 0.004        | 0.004 |
| PFHpA           | 0.307       | 0.102       | 0.024       | 0.038       | 0.674       | 1.788      | 0.021        | 0.008        | 0.009        | 0.001        | 0.014        | 0.003        | 0.088        | 0.015        | 0.017        | 0.019        | 0.009        | 0.011        | 0.006        | 0.004        | 0.004 |
| PFOA            | 0.458       | 1.06        | 0.158       | 0.642       | 1.09        | 11.9       | 0.038        | 0.009        | 0.017        | 0.002        | 0.037        | 0.007        | 0.032        | 0.007        | 0.008        | 0.006        | 0.023        | 0.022        | 0.009        | 0.005        | 0.005 |
| PFNA            | 0.715       | 0.219       | 0.048       | 0.109       | 0.267       | 1.55       | 0.013        | --           | 0.003        | --           | 0.012        | 0.001        | 0.008        | 0.002        | 0.003        | 0.002        | 0.006        | 0.012        | --           | --           | --    |
| PFDA            | 4.27        | 42.4        | 1.25        | 1.95        | 2.61        | 28.9       | 0.068        | 0.016        | 0.013        | 0.003        | 0.060        | 0.010        | 0.038        | 0.009        | 0.010        | 0.008        | 0.017        | 0.070        | 0.016        | 0.008        | 0.008 |
| PFUnA           | 0.247       | 0.281       | 0.005       | 0.062       | 0.293       | 4.12       | 0.015        | --           | 0.003        | --           | 0.015        | 0.001        | 0.016        | 0.005        | 0.004        | 0.003        | 0.005        | 0.006        | 0.003        | --           | --    |
| PFDoA           | 1.08        | 24.6        | 1.26        | 1.72        | 5.19        | 39.9       | 0.060        | 0.013        | 0.014        | 0.003        | 0.049        | 0.009        | 0.041        | 0.011        | 0.011        | 0.009        | 0.017        | 0.041        | 0.023        | 0.010        | 0.010 |
| PFTrDA          | 0.052       | 0.451       | 0.002       | 0.084       | 0.622       | 5.62       | 0.021        | --           | 0.004        | --           | 0.020        | 0.002        | 0.017        | 0.005        | 0.005        | 0.004        | 0.008        | 0.010        | 0.007        | 0.002        | 0.002 |
| PFTeDA          | 0.581       | 12.3        | 0.355       | 2.081       | 12.7        | 46.3       | 0.092        | 0.019        | 0.021        | 0.004        | 0.091        | 0.016        | 0.092        | 0.027        | 0.026        | 0.018        | 0.039        | 0.052        | 0.048        | 0.023        | 0.023 |
| PFBS            | --          | --          | 0.001       | 0.000       | --          | --         | --           | --           | --           | --           | --           | --           | --           | --           | --           | --           | --           | --           | --           | --           | --    |
| PFHxS           | --          | --          | --          | --          | --          | --         | --           | --           | --           | --           | --           | --           | --           | --           | --           | --           | --           | --           | 0.017        | --           | --    |
| PFOS            | --          | --          | 0.000       | --          | --          | --         | --           | --           | --           | --           | --           | --           | 0.003        | --           | --           | --           | --           | --           | --           | --           | --    |
| 6:2 FTS         | --          | --          | 0.000       | 0.002       | --          | --         | --           | --           | --           | --           | --           | --           | --           | --           | --           | --           | --           | --           | --           | --           | --    |
| 8:2 FTS         | --          | --          | 0.000       | 0.003       | 0.145       | 0.123      | --           | --           | --           | --           | --           | --           | --           | --           | --           | --           | --           | --           | --           | --           | --    |
| N-MeFOSA        | --          | --          | 0.000       | --          | --          | --         | --           | --           | --           | --           | --           | --           | --           | --           | --           | --           | --           | --           | --           | --           | --    |
| N-EtFOSE        | --          | --          | 0.003       | --          | --          | --         | --           | --           | --           | --           | --           | --           | --           | --           | --           | --           | --           | --           | --           | --           | --    |
| HFPO-DA         | --          | --          | 9.00        | 1.30        | 1.55        | 2.21       | --           | --           | --           | --           | --           | --           | 0.343        | 0.043        | 0.053        | 0.076        | --           | --           | --           | --           |       |
| PFMPA           | 0.018       | 0.242       | 0.030       | 0.015       | 0.518       | 4.07       | 0.009        | --           | --           | --           | 0.006        | 0.001        | 0.021        | 0.003        | 0.003        | 0.004        | 0.005        | --           | --           | --           |       |
| <b>36 Total</b> | <b>8.30</b> | <b>81.9</b> | <b>12.3</b> | <b>8.08</b> | <b>26.5</b> | <b>150</b> | <b>0.357</b> | <b>0.072</b> | <b>0.092</b> | <b>0.013</b> | <b>0.320</b> | <b>0.054</b> | <b>0.735</b> | <b>0.139</b> | <b>0.147</b> | <b>0.158</b> | <b>0.139</b> | <b>0.236</b> | <b>0.135</b> | <b>0.056</b> |       |
